$\text{Pa}_{\text{CO}_2}$  53 mmHg, and base excess  $-3.7$  M. Chest radiograph confirmed that there was no tension pneumothorax. However, neurologic assessment showed exacerbation of the hypoxic encephalopathy. After consultation with the family, it was agreed that supportive measures only would be continued. These included biphasic positive airway pressure ventilation with  $\text{Fi}_{\text{O}_2}$  0.7 via nasotracheal tube, giving blood gas analysis of  $\text{pH}$  7.30,  $\text{Pa}_{\text{CO}_2}$  57 mmHg,  $\text{Pa}_{\text{O}_2}$  68 mmHg, base excess  $-3.8$  M. Twenty-four hours later there was further deterioration in his condition, and he died without active resuscitation being performed.

The sequence of events strongly suggested a respiratory cause for both arrests. Although it may be difficult to rule out tension pneumothorax clinically, there is considerable risk in arbitrary placement of an intercostal needle or drain in a patient with severe bullous chronic obstructive pulmonary disease. A subsequent radiograph showed no pneumothorax. A more plausible explanation is the development of dynamic hyperinflation as a consequence of excessive end-expiratory pressure in the respiratory system, or auto-positive end-expiratory pressure; this may lead to significant impedance to venous return and reduction in cardiac output.<sup>2</sup> Although modern ventilators can be programmed to provide optimum cycle lengths, inspiratory-expiratory time ratios, variable inspiratory flow patterns, and external positive end-expiratory pressure to counter auto-positive end-expiratory pressure, such refinements are not available during manual ventilation in the heat of CPR. It is suggested that in this patient pressure in the respiratory system was so high that it shut down venous return. When CPR was discontinued and the endotracheal tube was removed, over the ensuing 5 min there was a gradual return of pressure in the respiratory system to atmospheric pressure, which allowed the heart to fill once more, leading to a return of spontaneous function.

Anesthesiology  
1999; 91:586  
© 1999 American Society of Anesthesiologists, Inc.  
Lippincott Williams & Wilkins, Inc.

*In Reply:*—In his letter, Dr. Maleck refers to previously reported cases of spontaneous recovery after unsuccessful resuscitation, including one of his own cases in which a patient was resuscitated for asystolic arrest for approximately 30 min and showed return of spontaneous circulation 5 min after cessation of resuscitation efforts. Dr. MacGillivray adds another case of asystolic arrest with spontaneous recovery after cardiopulmonary resuscitation (CPR). In both cases, resuscitative efforts were discontinued after an arbitrary time frame of 30 min.

The apparent question in the reported cases of the "Lazarus phenomenon," including my own, is whether resuscitation had been terminated prematurely. To date, there seems to be no consensus with respect to the timing of termination of CPR. The manual on advanced cardiac life support (ACLS) by the American Heart Association<sup>1</sup> states that resuscitation may be discontinued in the prehospital setting after an adequate trial of ACLS. An "extremely short attempt to reverse the arrest" is recommended for the intensive or critical care unit because of close monitoring by personnel and immediate attempts to reverse the arrest. In most clinical situations, CPR is discontinued after a full course of the relevant ACLS algorithm.

There are limited data on the predictability of outcome after CPR. Levine *et al.*<sup>2</sup> recommended the discontinuation of CPR if an end-tidal carbon dioxide level of  $\leq 10$  mmHg is measured 20 min after the initiation of ACLS. Dr. Maleck, in his letter, also makes reference to this

Like Dr. Frölich's case, our patient was fully monitored and chest compressions were observed to be effective in creating a waveform on the arterial line, yet the  $\text{pH}$  was 6.9 and there was asystole. This may be a further argument for monitoring for an additional 10 min after discontinuation of resuscitation, as suggested in a previous report.<sup>3</sup>

**Robin G. MacGillivray, F.C.A.(S.A.)**  
Director of Intensive Care  
Department of Anesthesiology  
The American Hospital Dubai  
Dubai, United Arab Emirates  
macgill@emirates.net.ae

## References

1. Frolich MA: Spontaneous recovery after discontinuation of intraoperative cardiopulmonary resuscitation: Case report. *ANESTHESIOLOGY* 1998; 89:1252-3
2. Donahoe M, Rogers RM: Acute respiratory failure in chronic obstructive pulmonary disease, *Textbook of Critical Care*, 3rd Edition. Edited by Ayres SM, Grenvik A, Holbrook PR, Shoemaker WC. Philadelphia, WB Saunders Company, 1995, pp 836-48
3. Linko K, Honkavaara P, Salmenpera M: Recovery after discontinued cardiopulmonary resuscitation (letter). *Lancet* 1982; 8263: 106-7

(Accepted for publication March 25, 1999.)

approach. I would use end-tidal  $\text{CO}_2$  as a parameter to gauge the effectiveness of resuscitation rather than to predict outcome. Nevertheless, it seems to be reasonable to discontinue CPR if effective circulation cannot be re-established over an extended period of time.

From my own and similar reported cases, I have learned that CPR should not automatically be discontinued if the end of the ACLS algorithm has been reached. Resuscitation may have to be continued until proven ineffective by parameters such as end-tidal  $\text{CO}_2$  or metabolic deterioration.

**Michael A. Frolich, M.D.**  
Department of Anesthesiology  
University of Florida College of Medicine  
Gainesville, Florida 32610-0254  
froelich@anest1.anest.ufl.edu

## References

1. American Heart Association: Ethical Aspects of CPR and ECC. Advanced Cardiac Life Support. Dallas, American Heart Association, 1997
2. Levine RL, Wayne MA, Miller CC: End-tidal carbon dioxide and outcome of out-of-hospital arrest. *N Engl J Med* 1997; 337:301-6

(Accepted for publication March 25, 1999.)
